# Supplementary material for: IL-2 Induces Transient Arrest in the G1 Phase to Protect Cervical Cancer Cells from Entering Apoptosis
Source: J Oncol. 2019 Sep 26;2019:7475295. doi: 10.1155/2019/7475295 (PMC6791272; doi:10.1155/2019/7475295)
Supplement: Supplementary Materials — Supplementary Figure 1: effect of IL-2 on DNA fragmentation in HeLa and INBL cervical cancer cell lines. Supplementary Figure 2: effect of IL-2 on the cell cycle of HeLa and INBL cell lines. Supplementary Figure 3: determination of the mean effective dose of cisplatin (IC50) to induce apoptosis in cervical cancer cells. Supplementary Figure 4: IL-2 protects G1-arrested cervical cancer cells from entering apoptosis. [file 7475295.f1.pdf]

## Supplementary figures

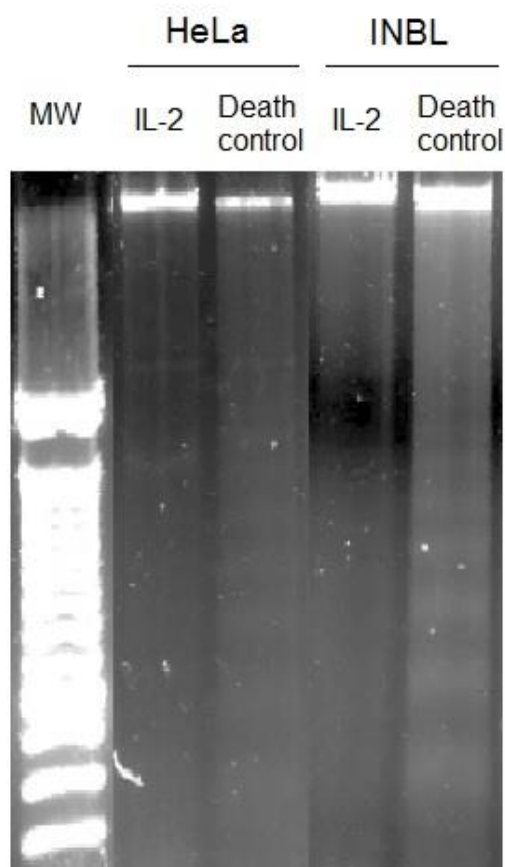

**Supplementary figure 1. Effect of IL-2 on DNA fragmentation in HeLa and INBL cervical cancer cell lines.** Agarose gel electrophoresis of fragmented cellular DNA induced by puromycin (death control) in comparison with the DNA of cells treated with IL-2. The DNA fragments were visualised by staining with ethidium bromide. MW: Molecular Weight. The gel is a representative image of three independent experiments.

A)

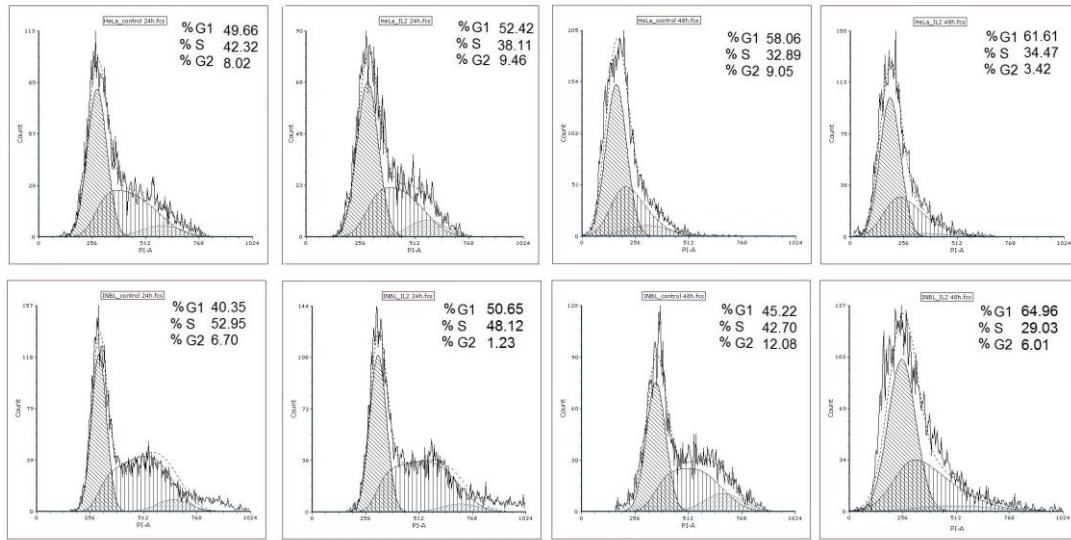

B)

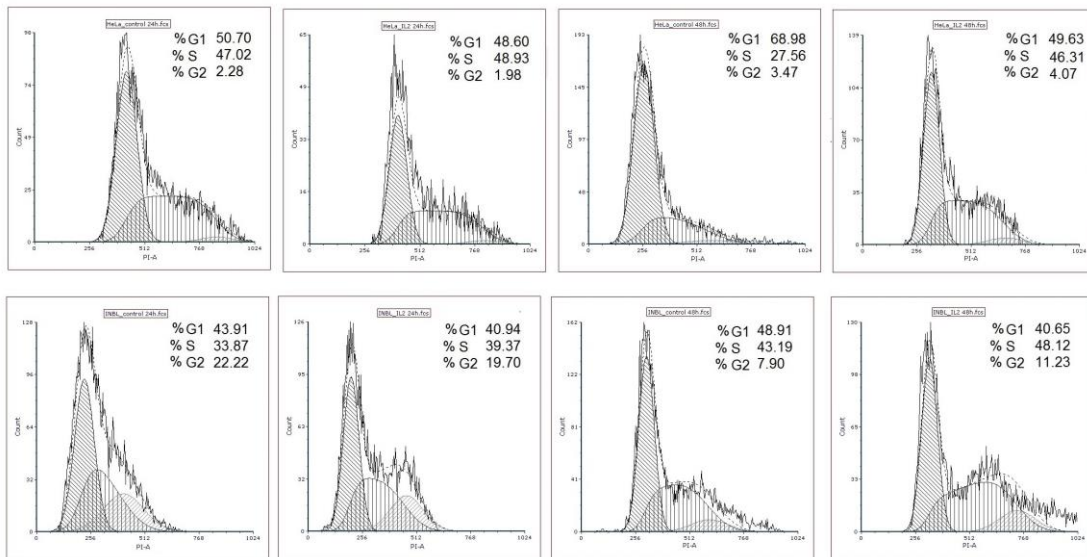

**Supplementary figure 2. Effect of IL-2 on the cell cycle of HeLa and INBL cell lines.** A) IL-2 induces arrest of the cell cycle in INBL cells at 48 hours. B) After changing the medium for fresh medium free of IL-2, the cells recover their proliferation. Representative images of three independent experiments using flow cytometry on a FACSaria II cytometer (BD, USA).

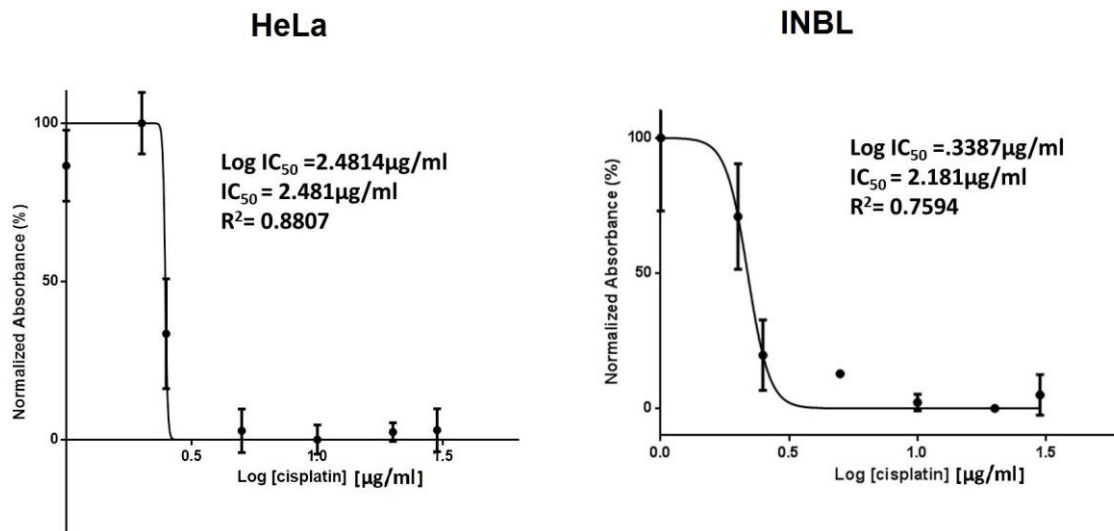

**Supplementary figure 3. Determination of the mean effective dose of cisplatin ( $IC_{50}$ ) to induce apoptosis in cervical cancer cells.** To determine the amount of cisplatin required to decrease cell population ( $IC_{50}$ ), we generated a dose-response curve. A) HeLa and B) INBL cells were incubated with and without 1, 2.5, 5, 10, 20, 30  $\mu$ g of cisplatin. Statistical analysis was performed using the statistical package Graphpad Prism 5.0.

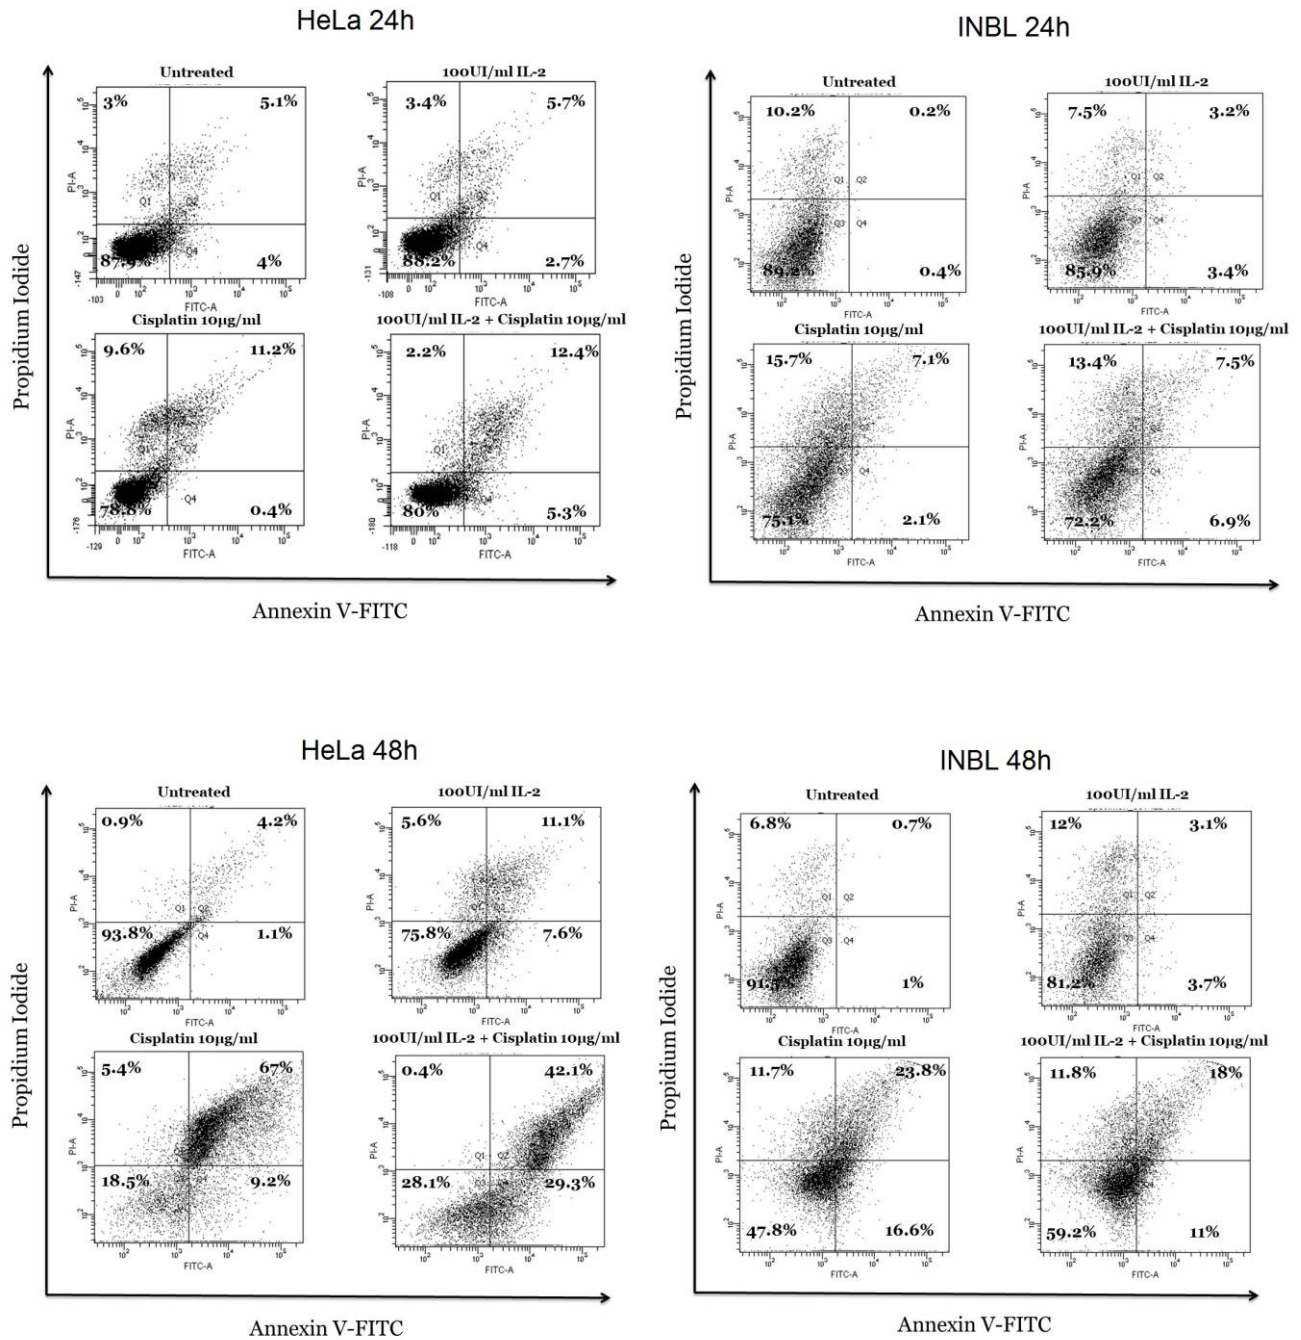

**Supplementary figure 4. IL-2 protects G1 arrested cervical cancer cells from entering apoptosis.** HeLa and INBL cells were incubated with and without IL-2 for 48 hours. After changing the medium, using fresh medium free of IL-2, cisplatin was added and cells were incubated for 24 hours (A) and 48 hours (B). Dot plots show apoptosis percentage after analysing IP and Annexin V-FITC by flow cytometry. Representative images of one out of three independent experiments are shown.
